# Supplementary material for: Dynamic allostery in the peptide/MHC complex enables TCR neoantigen selectivity
Source: PubMed Central journal article supplement (PMC11160895; doi:10.21203/rs.3.rs-4457195/v1), 2024-05-29
Supplement: NIHPPrs4457195V1-supplement-1.pdf [file NIHPPrs4457195V1-supplement-1.pdf]

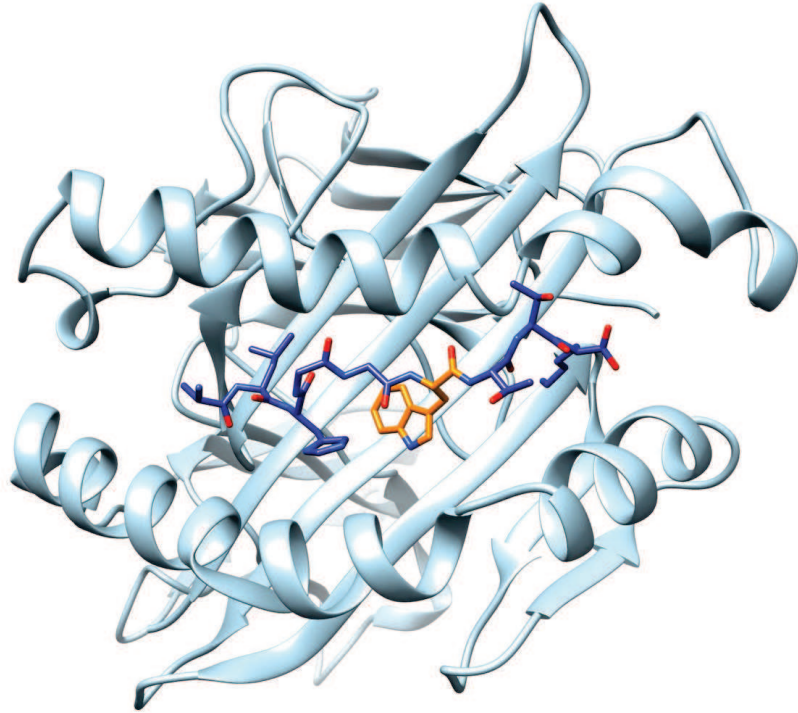

(movie uploaded as a separate file)

**Supplemental Movie. Trajectory of an under-peptide neoantigen flip from the reverse WEMD simulations.** The trajectory begins with pTrp6 of the neoantigen in the TCR-bound neoantigen (the flipped conformation). It flips via the peptide-limbo mechanism to the TCR-free conformation with a final RMSD to the target state of 0.6 Å. The actual transition is rapid and occurs at approximately 4 seconds, or approximately 2300 frames into the 5410 frame simulation.

**Supplemental Table 1.** X-ray data collection and refinement statistics for the Bta6-substituted neoantigen/HLA-A3 complex\*

| <b>PIK3CA-Bta6-neo/HLA-A3</b>      |                            |
|------------------------------------|----------------------------|
| PDB accession code                 | 9ASG                       |
| Resolution range (Å)               | 44.02 - 2.03 (2.10 - 2.03) |
| Space group                        | P 6 2 2                    |
| Unit cell dimensions (Å)           | 156.80, 156.80, 85.60      |
| Unit cell angles (°)               | 90, 90, 120                |
| Total reflections                  | 1,381,818 (105,151)        |
| Unique reflections                 | 40,437 (3563)              |
| Multiplicity                       | 34.2 (26.5)                |
| Completeness                       | 0.972 (0.899)              |
| Mean I/sigma(I)                    | 25.73 (3.72)               |
| Wilson B-factor                    | 24                         |
| R-merge                            | 0.202 (1.548)              |
| R-meas                             | 0.205 (1.581)              |
| R-pim                              | 0.036 (0.315)              |
| CC1/2                              | 0.997 (0.778)              |
| CC*                                | 0.999 (0.936)              |
| Reflections used in refinement     | 39,361 (3563)              |
| Reflections used for R-free        | 3891 (350)                 |
| R-work                             | 0.202 (0.271)              |
| R-free                             | 0.237 (0.302)              |
| CC(work)                           | 0.946 (0.831)              |
| CC(free)                           | 0.936 (0.716)              |
| Number of non-hydrogen atoms       | 3535                       |
| macromolecules                     | 3127                       |
| ligands                            | 6                          |
| solvent                            | 402                        |
| Protein residues                   | 382                        |
| RMS(bonds)                         | 0.003                      |
| RMS(angles)                        | 0.64                       |
| Ramachandran favored (%)           | 98.66                      |
| Ramachandran allowed (%)           | 1.34                       |
| Ramachandran outliers (%)          | 0                          |
| Rotamer outliers (%)               | 1.82                       |
| Clashscore                         | 2.63                       |
| Average B-factor (Å <sup>2</sup> ) | 39.38                      |
| macromolecules                     | 38.95                      |
| ligands                            | 36.72                      |
| solvent                            | 42.72                      |
| Number of TLS groups               | 4                          |

\*Numbers in parentheses are for the highest resolution shell.

**Supplemental Table 2.** Largest contiguous cavities between peptides and MHC binding grooves in structures of complexes in the HLA-A3 superfamily.

| <b>PDB ID</b>                    | <b>HLA</b> | <b>Peptide length</b> | <b>Volume (Å<sup>3</sup>)</b> |
|----------------------------------|------------|-----------------------|-------------------------------|
| 2xpg                             | A3         | 9                     | 293                           |
| 3rl1                             | A3         | 9                     | 139                           |
| 3rl2                             | A3         | 10                    | 94                            |
| 6o9b                             | A3         | 9                     | 266                           |
| 6o9c                             | A3         | 9                     | 343                           |
| 7l1b                             | A3         | 9                     | 270                           |
| 71lc ( <i>PIK3CA</i> neoantigen) | A3         | 9                     | 401                           |
| 7mle                             | A3         | 9                     | 172                           |
| 7uc5                             | A3         | 9                     | 31                            |
| 8dvg                             | A3         | 10                    | 14                            |
| 1q94                             | A11        | 9                     | 134                           |
| 1qvo                             | A11        | 10                    | 270                           |
| 1x7q                             | A11        | 9                     | 173                           |
| 2hn7                             | A11        | 10                    | 81                            |
| 4mj5                             | A11        | 11                    | 99                            |
| 4mj6                             | A11        | 11                    | 180                           |
| 5grd                             | A11        | 10                    | 80                            |
| 5gsd                             | A11        | 7                     | 267                           |
| 5wjl                             | A11        | 10                    | 53                            |
| 5wjn                             | A11        | 10                    | 342                           |
| 6joz                             | A11        | 9                     | 282                           |
| 7m8t                             | A11        | 9                     | 223                           |
| 7ow3                             | A11        | 10                    | 59                            |
| 7s8q                             | A11        | 10                    | 340                           |
| 7s8r                             | A11        | 9                     | 102                           |
| 7s8s                             | A11        | 10                    | 61                            |
| 7wkj                             | A11        | 9                     | 96                            |
| 8i5e                             | A11        | 9                     | 49                            |
| 6j1w                             | A30        | 9                     | 148                           |
| 6j1v                             | A30        | 9                     | 436                           |
| 6j29                             | A30        | 9                     | 165                           |
| 6j2a                             | A30        | 9                     | 289                           |
| 4hwz                             | A68        | 9                     | 137                           |
| 4hx1                             | A68        | 9                     | 115                           |
| 4i48                             | A68        | 9                     | 151                           |
| 6ei2                             | A68        | 10                    | 70                            |

Average: 178 Å<sup>3</sup>

Standard deviation: 113 Å<sup>3</sup>
